# Supplementary material for: Validity of remote live stream video evaluation of the North Star Ambulatory Assessment in patients with Duchenne muscular dystrophy
Source: PubMed Central journal article supplement (PMC11098514; doi:10.1371/journal.pone.0300700), 2024-05-16
Supplement: pone.0300700.s001.pdf [file pone.0300700.s001.pdf]

**S1 Fig. NSAA is a composite endpoint evaluating physical function across 17 tests with increasing difficulty**

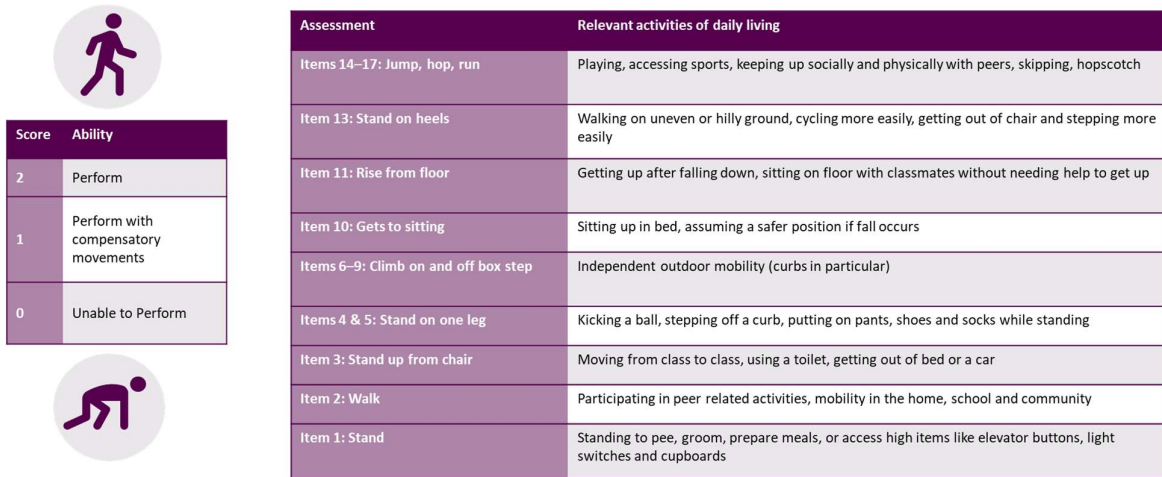

NSAA, North Star Ambulatory Assessment.
