# Supplementary material for: Validity of remote live stream video evaluation of the North Star Ambulatory Assessment in patients with Duchenne muscular dystrophy
Source: PubMed Central journal article supplement (PMC11098514; doi:10.1371/journal.pone.0300700), 2024-05-16
Supplement: pone.0300700.s003.pdf [file pone.0300700.s003.pdf]

**S2 Table. Overview of participants included in this analysis**

| <b>NSAA</b>                                                                                                    | <b>Study 101</b>                      | <b>Study 102</b>                                                        |                                                                | <b>Both</b>     |
|----------------------------------------------------------------------------------------------------------------|---------------------------------------|-------------------------------------------------------------------------|----------------------------------------------------------------|-----------------|
|                                                                                                                | Delandistrogene moxeparvovec<br>N = 4 | Assigned to received delandistrogene moxeparvovec in Part 1<br>(N = 20) | Assigned to receive placebo in Part 1<br>(N = 21) <sup>a</sup> | Total<br>N = 45 |
| <b>Number of remote assessments</b>                                                                            | 5                                     | 31                                                                      | 22                                                             | 58              |
| <b>Number of patients with remote assessments</b>                                                              | 2                                     | 12                                                                      | 9                                                              | 23              |
| <b>Number of patients with remote and in-clinic assessments (within 2 weeks of one another)</b>                | 1                                     | 9                                                                       | 8                                                              | 18              |
| Number of patients with only one pair of remote and in-clinic assessments (within 2 weeks of one another)      | 0                                     | 8                                                                       | 7                                                              | 15              |
| Number of patients with more than one pair of remote and in-clinic assessments (within 2 weeks of one another) | 1                                     | 1                                                                       | 1                                                              | 3               |
| <b>Comparable remote and in-clinic assessments</b>                                                             |                                       |                                                                         |                                                                |                 |
| <b>Number of patients with comparable assessments</b>                                                          | 1                                     | 9                                                                       | 8                                                              | 18              |
| <b>Number of instances (pairs of assessments)</b>                                                              | 2                                     | 10                                                                      | 9                                                              | 21              |

<sup>a</sup>These patients were to receive delandistrogene moxeparvovec in Part 2 of Study 102. As all remote assessment data are from Part 1 of Study 102, these patients did not receive delandistrogene moxeparvovec treatment.

NSAA, North Star Ambulatory Assessment.
